# Supplementary material for: Highly sensitive photoalignment of calamitic and discotic liquid crystals assisted by axis-selective triplet energy transfer
Source: Royal Society of Chemistry journal article supplement (doi:10.1039/c0cp02016h), 2011-01-01
Supplement: c0cp02016h.pdf [file c0cp02016h.pdf]

## Electronic Supplementary Information

### Highly sensitive photoalignment of calamitic and discotic liquid crystals assisted by axis-selective triplet energy transfer

Seiichi Furumi<sup>\*a</sup> and Kunihiro Ichimura<sup>\*b</sup>

*a* Dr. S. Furumi

National Institute for Materials Science (NIMS),  
1-2-1 Sengen, Tsukuba, Ibaraki 305-0047, Japan  
E-mail: FURUMI.Seiichi@nims.go.jp

*b* Prof. K. Ichimura

Faculty of Science, Toho University,  
2-2-1 Miyama, Funabashi, Chiba 274-8510, Japan  
E-mail: k-ichimura@sci.toho-u.ac.jp

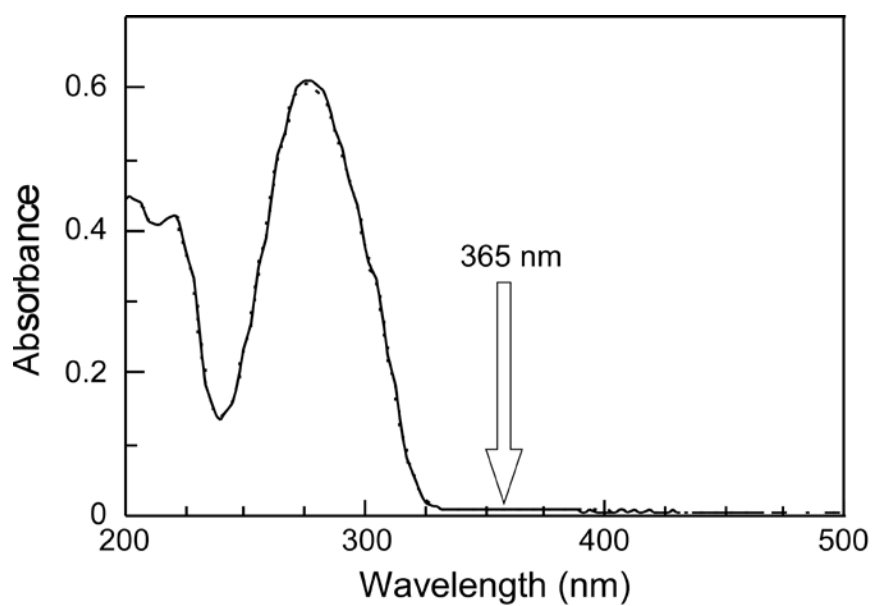

Fig. S1. Absorption spectra of a pristine pMCI film before (solid) and after exposure to 365 nm light of a  $6.0 \text{ J/cm}^2$  dose (dash). Notice that the spectra are overlapped with each other.

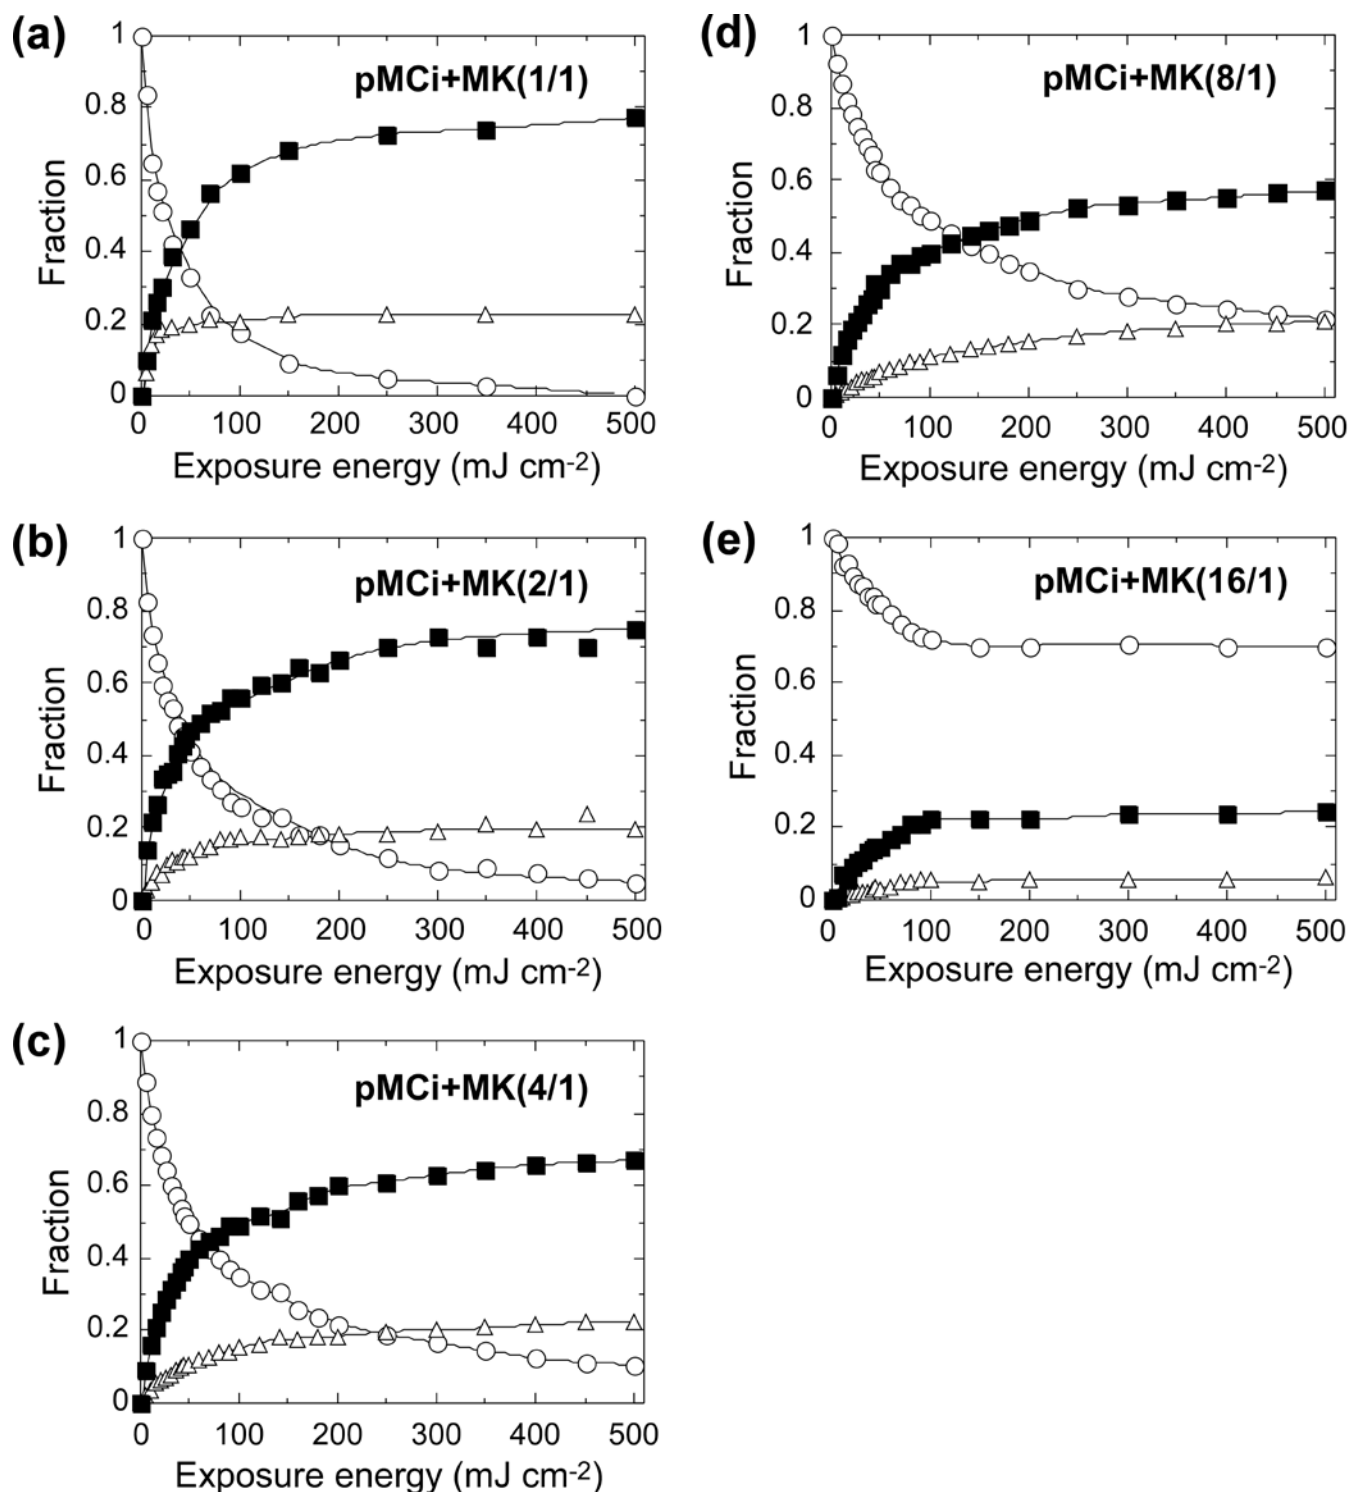

Fig. S2. Changes in distribution of *E*-isomer (open circles), *Z*-isomer (open triangles) and photodimer(s) (closed squares) of cinnamoly moieties in films of pMCI+MK(1/1) (a), pMCI+MK(2/1) (b), pMCI+MK(4/1) (c), pMCI+MK(8/1) (d) and pMCI+MK(16/1) (e) upon photoirradiation with 365 nm light as a function of the exposure energy.

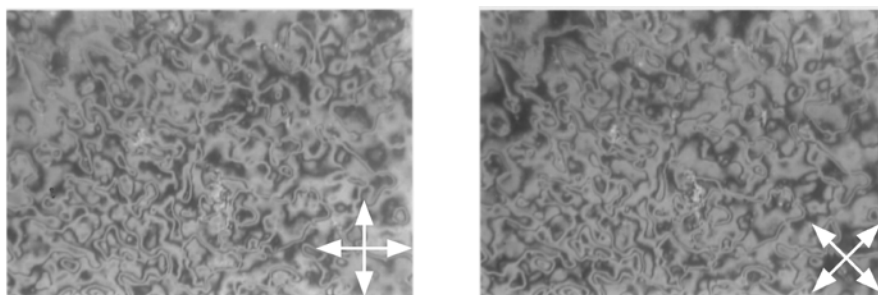

Fig. S3. Polarized optical microphotographs of a hybrid 5CB cell assembled with a pMMA+MK(2/1) film, which was irradiated with linearly polarized 365 nm light in advance. The exposure energy was  $1.0 \text{ J/cm}^2$ . White arrows mean the polarization plane of the polarized optical microscopy. The meaning of pMMA is poly(methyl methacrylate).
